# Supplementary material
Source: publisher site journal article supplement (https://www.oncotarget.com/article/28298)
Supplement: Supplementary file 1 [file 28298]

## Addendum

**Addendum: A case report of metastatic giant sarcomatoid melanoma with BRAF V600E mutation: a complete response to targeted therapy****Matteo Torresetti<sup>1</sup>, Donatella Brancorsini<sup>2</sup>, Francesca Morgese<sup>3</sup>, Valeria Cognigni<sup>3</sup>, Alessandro Scalise<sup>1</sup>, Rossana Berardi<sup>3</sup> and Giovanni Di Benedetto<sup>1</sup>**<sup>1</sup>Clinic of Plastic and Reconstructive Surgery, Marche Polytechnic University Medical School, Ancona, Italy<sup>2</sup>Section of Pathological Anatomy, Marche Polytechnic University Medical School, Ancona, Italy<sup>3</sup>Clinic of Medical Oncology, Marche Polytechnic University Medical School, Ancona, Italy**Published:****Copyright:** © 2022 Torresetti et al. This is an open access article distributed under the terms of the [Creative Commons Attribution License](#) (CC BY 3.0), which permits unrestricted use, distribution, and reproduction in any medium, provided the original author and source are credited.**Consent was added to this article:** The patient provided written informed consent for surgery and the use of pictures for academic and study purposes.Original article: Oncotarget. 2020; 11:3256–3262. <https://doi.org/10.18632/oncotarget.27701>
